# Supplementary material
Source: HighWire-hosted journal article supplement (https://casereports.bmj.com/content/16/5/e254632)
Supplement: inline-supplementary-material-1 [file inline-supplementary-material-1.pdf]

**Supplementary Table 1. Targeted human leukocyte antigen (HLA) class II phenotyping performed by sequence-specific oligonucleotide polymerase chain reaction.** This was performed on whole peripheral blood.

| HLA locus                    | Typing result |
|------------------------------|---------------|
| HLA-DRB1                     | 09:01/09:01   |
| HLA-DQA1                     | 03:02/03:03   |
| HLA DQB1                     | 03:03/03:03   |
| HLA-DR2 (DRB1*15 or DRB1*16) | Not detected  |
| HLA-DR3 (DRB1*03)            | Not detected  |
